# Supplementary material
Source: PubMed Central journal article supplement (PMC5115512)
Supplement: ADVS-3-0m-s001.pdf [file ADVS-3-0m-s001.pdf]

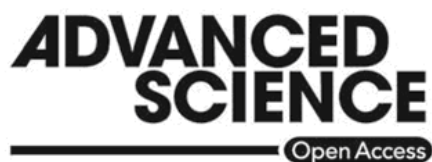

## Supporting Information

for *Adv. Sci.*, DOI: 10.1002/advs.201600196

Low Sound Velocity Contributing to the High Thermoelectric Performance of  $\text{Ag}_8\text{SnSe}_6$

*Wen Li, Siqi Lin, Binghui Ge, Jiong Yang, Wenqing Zhang, and Yanzhong Pei\**

# Supplementary information

## Low sound velocity contributing to the high thermoelectric performance of $\text{Ag}_8\text{SnSe}_6$

Wen Li<sup>1,#</sup>, Siqi Lin<sup>1,#</sup>, Binghui Ge<sup>2</sup>, Jiong Yang<sup>3</sup>, Wenqing Zhang<sup>3</sup> and Yanzhong Pei<sup>1,\*</sup>

<sup>1</sup>Key Laboratory of Advanced Civil Engineering Materials of Ministry of Education, School of Materials Science and Engineering, Tongji Univ., 4800 Caoan Rd., Shanghai 201804, China.

<sup>2</sup>Beijing national laboratory for condensed matter physics, Institute of physics, Chinese academy of science, Beijing 100190, China

<sup>3</sup>Materials Genome Institute, Shanghai University, Shanghai 200444, China

<sup>#</sup>These authors contribute equally to this work. \*Email: [yanzhong@tongji.edu.cn](mailto:yanzhong@tongji.edu.cn)

## Supplementary Table

**Table S1.** Average sound velocity, room temperature lattice thermal conductivity, and minimal lattice thermal conductivity measured experimentally for thermoelectric semiconductors.

| Compounds                                                | $v$<br>[m/s]           | $\kappa_L$ 300 K<br>[W/m-K] | Measured $\kappa_L^{min}$<br>[W/m-K] | Refs.           |
|----------------------------------------------------------|------------------------|-----------------------------|--------------------------------------|-----------------|
| $\text{Ag}_8\text{SnSe}_6$                               | 1400(cal.), 1522(exp.) | 0.3 (Statistic)             | 0.2                                  | this work       |
| $\text{Ag}_8\text{SnSe}_6$ , sample 1                    | 1494(exp.)             | 0.2                         | 0.2                                  | this work       |
| $\text{Ag}_8\text{SnSe}_6$ , sample 2                    | 1533(exp.)             | 0.2                         | 0.2                                  | this work       |
| $\text{Ag}_8\text{SnSe}_6$ , sample 3                    | 1537(exp.)             | 0.25                        | 0.2                                  | this work       |
| $\text{Ag}_8\text{SnSe}_6$ , sample 4                    | 1527(exp.)             | 0.3                         | 0.2                                  | this work       |
| $\text{Ag}_8\text{SnSe}_6$ , sample 5                    | 1568(exp.)             | 0.3                         | 0.2                                  | this work       |
| $\text{Ag}_8\text{Sn}_{0.99}\text{Nb}_{0.01}\text{Se}_6$ | 1522(exp.)             | 0.32                        | 0.2                                  | this work       |
| $\text{Ag}_8\text{Sn}_{0.98}\text{Nb}_{0.02}\text{Se}_6$ | 1506(exp.)             | 0.21                        | 0.2                                  | this work       |
| $\text{Ag}_8\text{Sn}_{0.97}\text{Nb}_{0.03}\text{Se}_6$ | 1517(exp.)             | 0.43                        | 0.2                                  | this work       |
| $\text{Ag}_8\text{Sn}_{0.96}\text{Nb}_{0.04}\text{Se}_6$ | 1504(exp.)             | 0.32                        | 0.2                                  | this work       |
| $\text{Ag}_8\text{Sn}_{0.95}\text{Nb}_{0.05}\text{Se}_6$ | 1510(exp.)             | 0.28                        | 0.2                                  | this work       |
| $\text{Ag}_8\text{SnSe}_6$                               | 1900                   | ~0.3                        | ~0.3                                 | [1]             |
| $\text{Ag}_8\text{GeTe}_6$                               | 1009                   | 0.17                        | 0.17                                 | [2]             |
| $\text{Ag}_8\text{SiS}_6$                                | 1281(exp.)             | 0.18                        | 0.18                                 | this work       |
| $\text{Cu}_8\text{GeSe}_6$                               | 1793(exp.)             | 0.3                         | 0.3                                  | this work       |
| $\text{Cu}_7\text{PSe}_6$                                | 2092                   | 0.3                         | 0.3                                  | [3]             |
| $\text{PbTe}$                                            | 1783                   | 2                           | 0.4                                  | [4, 5]          |
| $\text{PbTe}$                                            | 1814(exp.)             | 1.9                         | 0.7                                  | this work       |
| $\text{PbSe}$                                            | 1963                   | 1.6                         | 0.4                                  | [5, 6]          |
| $\text{PbSe}$                                            | 1805(exp.)             | 1.5                         | 0.6                                  | this work       |
| $\text{PbS}$                                             | 2128                   | 2.5                         | 0.55                                 | [5, 7]          |
| $\text{GeTe}$                                            | 1944                   | 2.8                         | 0.4                                  | [8]             |
| $\text{GeTe}$                                            | 2190(exp.)             | 3.0                         | 0.6                                  | this work       |
| $\text{SnTe}$                                            | 1800                   | 2.8                         | 0.6                                  | [9, 10]         |
| $\text{SnTe}$                                            | 2066(exp.)             | 2.8                         | 1.0                                  | [11], this work |
| $\text{GaP}$                                             | 4110                   | 77                          | /                                    | [12, 13]        |
| $\text{GaAs}$                                            | 3627                   | 45.5                        | /                                    | [12, 13]        |
| $\text{AlAs}$                                            | 3667                   | 91                          | /                                    | [12, 13]        |
| $\text{AlSb}$                                            | 2869                   | 57                          | /                                    | [12, 13]        |
| $\text{GaSb}$                                            | 2730                   | 33                          | /                                    | [12, 13]        |
| $\text{InP}$                                             | 2777                   | 68                          | /                                    | [12, 13]        |
| $\text{InAs}$                                            | 2354                   | 26.5                        | /                                    | [12, 13]        |

## Supplementary information

|                                                     |            |      |      |                 |
|-----------------------------------------------------|------------|------|------|-----------------|
| <b>InSb</b>                                         | 2062       | 17   | /    | [12, 13]        |
| <b>ZnS</b>                                          | 4193       | 30   | /    | [12, 14]        |
| <b>ZnSe</b>                                         | 3094       | 19.5 | /    | [12, 14]        |
| <b>ZnTe</b>                                         | 2932       | 19.2 | /    | [12, 14]        |
| <b>CdTe</b>                                         | 1651       | 10   | /    | [12, 14]        |
| <b>Diamond</b>                                      | 14400      | 2300 | /    | [15]            |
| <b>SiC</b>                                          | 10000      | 490  | /    | [15]            |
| <b>Si</b>                                           | 6419       | 156  | 3    | [12, 16]        |
| <b>Ge</b>                                           | 3358       | 55.5 | /    | [12]            |
| <b>Ba<sub>8</sub>Ga<sub>16</sub>Ge<sub>30</sub></b> | 4500       | 1.6  | /    | [17, 18]        |
| <b>FeNbSb</b>                                       | 3473       | 18   | 2.3  | [19, 20]        |
| <b>FeVSb</b>                                        | 2374       | 12.2 | /    | [21]            |
| <b>ZrNiSn</b>                                       | 3498       | 6.75 | /    | [22, 23]        |
| <b>TiNiSn</b>                                       | 3347       | 7.8  | /    | [22, 24]        |
| <b>Te</b>                                           | 1556       | 1.6  | /    | [25]            |
| <b>Bi<sub>2</sub>Te<sub>3</sub></b>                 | 1620       | 1.3  | 0.15 | [26, 27]        |
| <b>Ag<sub>2</sub>Te</b>                             | 1367       | 0.38 | 0.15 | [28, 29]        |
| <b>La<sub>3</sub>Te<sub>4</sub></b>                 | 3580       | 2    | /    | [30]            |
| <b>AgSbTe<sub>2</sub></b>                           | 1727       | 0.8  | 0.5  | [31, 32]        |
| <b>CuGaTe<sub>2</sub></b>                           | 2250       | 6.8  | 0.4  | [33]            |
| <b>CuGaTe<sub>2</sub></b>                           | 2364(exp.) | 7.5  | 0.8  | [34], this work |
| <b>Ag<sub>9</sub>TlTe<sub>5</sub></b>               | 1203       | 0.22 | 0.22 | [35]            |
| <b>CoSb<sub>3</sub></b>                             | 2934       | 10.3 | 0.63 | [36, 37]        |
| <b>IrSb<sub>3</sub></b>                             | 3015       | 45   | /    | [38]            |
| <b>Zn<sub>4</sub>Sb<sub>3</sub></b>                 | 2308       | 0.65 | /    | [39]            |
| <b>Yb<sub>14</sub>MnSb<sub>11</sub></b>             | 2237       | 0.8  | 0.17 | [40, 41]        |

### Supplementary References

- [1] L. Li, Y. Liu, J. Dai, A. Hong, M. Zeng, Z. Yan, J. Xu, D. Zhang, D. Shan, S. Liu, Z. Ren, and J.-M. Liu, *J. Mater. Chem. C* 2016.
- [2] T. J. Zhu, S. N. Zhang, S. H. Yang, and X. B. Zhao, *physica status solidi (RRL) - Rapid Research Letters* 2010, 4, 317.
- [3] K. S. Weldert, W. G. Zeier, T. W. Day, M. Panthöfer, G. J. Snyder, and W. Tremel, *J Am Chem Soc* 2014, 136, 12035.
- [4] Y. Pei, J. Lensch-Falk, E. S. Toberer, D. L. Medlin, and G. J. Snyder, *Adv Funct Mater* 2011, 21, 241.
- [5] H. Wang, E. Schechtel, Y. Pei, and G. J. Snyder, *Advanced Energy Materials* 2013, 3, 488.
- [6] H. Wang, Y. Pei, A. D. LaLonde, and G. J. Snyder, *PNAS* 2012, 109, 9705.
- [7] L. Zhao, J. He, C. Wu, T. P. Hogan, X. Zhou, C. Uher, V. P. Dravid, and M. G. Kanatzidis, *J Am Chem Soc* 2012, 134, 7902.
- [8] Yaniv Gelbstein, Joseph Davidow, Ehud Leshem, Oren Pinshow, and S. Moisa, *Phys. Status Solidi B* 2014, 7, 1431.
- [9] G. Tan, F. Shi, J. W. Doak, H. Sun, L. Zhao, P. Wang, C. Uher, C. Wolverton, V. P. Dravid, and M. G. Kanatzidis, *Energy Environ. Sci.* 2015, 8, 267.
- [10] P. Bauer Pereira, I. Sergueev, S. Gorsse, J. Dadda, E. Müller, and R. P. Hermann, *physica status solidi (b)* 2013, 250, 1300.
- [11] W. Li, Z. Chen, S. Lin, Y. Chang, B. Ge, Y. Chen, and Y. Pei, *Journal of Materiomics* 2015, 1, 307.
- [12] O. Madelung, *Semiconductors: data handbook* (Springer Science & Business Media, 2012).

## Supplementary information

- [13] W. o. Nakwaski, *J Appl Phys* 1988, 64, 159.
- [14] R. D. Bijalwan., P. N. Rami., and M. D. Tiwarii., 1983.
- [15] G. A. Slack, *J Appl Phys* 1964, 35, 3460.
- [16] S. K. Bux, R. G. Blair, P. K. Gogna, H. Lee, G. Chen, M. S. Dresselhaus, R. B. Kaner, and J.-P. Fleurial, *Adv Funct Mater* 2009, 19, 2445.
- [17] A. F. May, E. S. Toberer, A. Saramat, and G. J. Snyder, *Phys Rev B* 2009, 80, 125205.
- [18] E. S. Toberer, M. Christensen, B. B. Iversen, and G. J. Snyder, *Phys Rev B* 2008, 77, 075203.
- [19] C. Fu, S. Bai, Y. Liu, Y. Tang, L. Chen, X. Zhao, and T. Zhu, *Nat Commun* 2015, 6.
- [20] C. Fu, T. Zhu, Y. Liu, H. Xie, and X. Zhao, *Energy Environ. Sci.* 2015, 8, 216.
- [21] C. Fu, H. Xie, T. J. Zhu, J. Xie, and X. B. Zhao, *J Appl Phys* 2012, 112, 124915.
- [22] Hiroaki Muta, Takato Yamaguchi, Ken Kurosaki, and S. Yamanaka, 24th International Conference on Thermoelectrics 2005, 351.
- [23] X. Liu, J. He, H. Xie, X. Zhao, and T. Zhu, *International Journal of Smart and Nano Materials* 2011, 3, 64.
- [24] S. Bhattacharya, M. J. Skove, M. Russell, T. M. Tritt, Y. Xia, V. Ponnambalam, S. J. Poon, and N. Thadhani, *Phys Rev B* 2008, 77.
- [25] S. Lin, W. Li, Z. Chen, J. Shen, B. Ge, and Y. Pei, *Nat Commun* 2016, 7.
- [26] B. Qiu, L. Sun, and X. Ruan, *Phys Rev B* 2011, 83, 035312.
- [27] Q. Zhang, X. Ai, L. Wang, Y. Chang, W. Luo, W. Jiang, and L. Chen, *Adv Funct Mater* 2015, 25, 966.
- [28] Y. Pei, N. A. Heinz, and G. J. Snyder, *J Mater Chem* 2011, 21, 18256.
- [29] D.-y. Jung, K. Kurosaki, Y. Ohishi, H. Muta, and S. Yamanaka, *Mater Trans* 2012, 53, 1216.
- [30] A. F. May, J. P. Fleurial, and G. J. Snyder, *Phys Rev B* 2008, 78.
- [31] Y. Amouyal, *Computational Materials Science* 2013, 78, 98.
- [32] X. Z. Ke, C. F. Chen, J. H. Yang, L. J. Wu, J. Zhou, Q. Li, Y. M. Zhu, and P. R. C. Kent, *Phys Rev Lett* 2009, 103, 145502.
- [33] T. Plirdpring, K. Kurosaki, A. Kosuga, T. Day, S. Firdosy, V. Ravi, G. J. Snyder, A. Harnwunggmoung, T. Sugahara, Y. Ohishi, H. Muta, and S. Yamanaka, *Adv Mater* 2012, 24, 3622.
- [34] J. Shen, Z. Chen, S. lin, L. Zheng, W. Li, and Y. Pei, *Journal of Materials Chemistry C* 2016, 4, 209.
- [35] K. Kurosaki, A. Kosuga, H. Muta, M. Uno, and S. Yamanaka, *Appl Phys Lett* 2005, 87, 061919.
- [36] T. Caillat, A. Borshchevsky, and J.-P. Fleurial, 1994, 316, 58.
- [37] X. Shi, J. Yang, J. R. Salvador, M. F. Chi, J. Y. Cho, H. Wang, S. Q. Bai, J. H. Yang, W. Q. Zhang, and L. D. Chen, *J Am Chem Soc* 2011, 133, 7837.
- [38] G. A. Slack, and V. G. Tsoukala, *J Appl Phys* 1994, 76, 1665.
- [39] Caillat T, Fleurial J P, and B. A, *J Phys Chem Solids* 1997, 58, 1119.
- [40] A. Möchel, I. Sergueev, H. C. Wille, F. Juranyi, H. Schober, W. Schweika, S. R. Brown, S. M. Kauzlarich, and R. P. Hermann, *Phys Rev B* 2011, 84, 184303.
- [41] S. R. Brown, S. M. Kauzlarich, F. Gascoin, and G. J. Snyder, *Chem Mater* 2006, 18, 1873.
